# Supplementary material for: Differential contribution of cis-regulatory elements to higher order chromatin structure and expression of the CFTR locus
Source: PubMed Central journal article supplement — Nucleic Acids Res. 2015 Dec 15;44(7):3082–94. doi: 10.1093/nar/gkv1358 (PMC4838340; doi:10.1093/nar/gkv1358), 2015-12-15
Supplement: supp_gkv1358_nar-01920-x-2015-File008.pdf [file supp_gkv1358_nar-01920-x-2015-File008.pdf]

## Supplementary Figure Legends

Supplementary Figure 1. Hi-C data at the *CFTR* locus from human fibroblasts cells generated by the Ren Lab (data source: <http://www.3dgenome.org>). Dotted red lines indicate the TAD boundaries identified by 4C-seq, which are consistent with the Hi-C data. CTCF ChIP-seq data from ENCODE are also shown.

Supplementary Figure 2. Validation of 4C interactions by FISH. (A) Screen shot from UCSC genome browser showing the locations of BACs used for the FISH experiment. (B) Representative FISH images showing nuclear staining with DAPI, individual fluorescent BAC probes, and all signals merged. (C) Box and whisker plot showing quantification of physical distances between BAC probes. The box represent 25% to 75% percentile and bars represent 5% to 95% percentile. Images from 94 nuclei (282 pairs) were used for the quantification.

Supplementary Figure 3. Design and validation of CRISPR/Cas9 mediated deletion of *cis*-regulatory elements. (A, B) -20.9 kb site deletion. (A) UCSC genome browser graphic showing schematic for the design of the CRISPR/Cas9 target deletion and its location relative to the -20.9kb DHS. Below, the location of the deletion breakpoints is shown following direct sequencing of gel-purified PCR products generated using flanking primers (Suppl. Table 3). (B) Agarose gel image showing PCR product with

no template (1), 2 alleles deleted (2), and all three alleles deleted (3) (note Caco2 is 3N for CFTR). (C, D) intron 11 DHS deletion. (C) UCSC genome browser graphic showing schematics for the design of CRISPR/Cas9 deletion and its location relative to the intron 11 DHS. Below, the location of the deletion breakpoints is shown (as for A) (Suppl. Table 3). (D) Agarose gel image showing PCR product using template from WT (1), one allele deleted (2), two alleles deleted (3), and all three alleles deleted clones (4).

Supplementary Figure 4. Test splicing variants in WT and del11 clones by RT-PCR. cDNA from 2 WT and 4 del11 clones were used for RT-PCR. Primers used are illustrated by the schematic and described in Chalkley et al. J. Med. Genet. 1991. All WT and del11 clones show same splicing variants: 1kb product being the full length product; and 0.8kb product that lacks exon 12 (exon 12 (-)), which is common in normal tissues.

Supplementary Figure 5. Measurement of CTCF enrichment at the gel-forming mucin gene cluster on chromosome 11, in del-20.9 clones. (A) Schematic showing the position of CTCF binding sites (numbered I to XIII) relative to the mucin genes. (B) CTCF enrichment was assayed by ChIP-qPCR at site IV and IX. Results are mean  $\pm$  S.E.M., n=4, not significant.

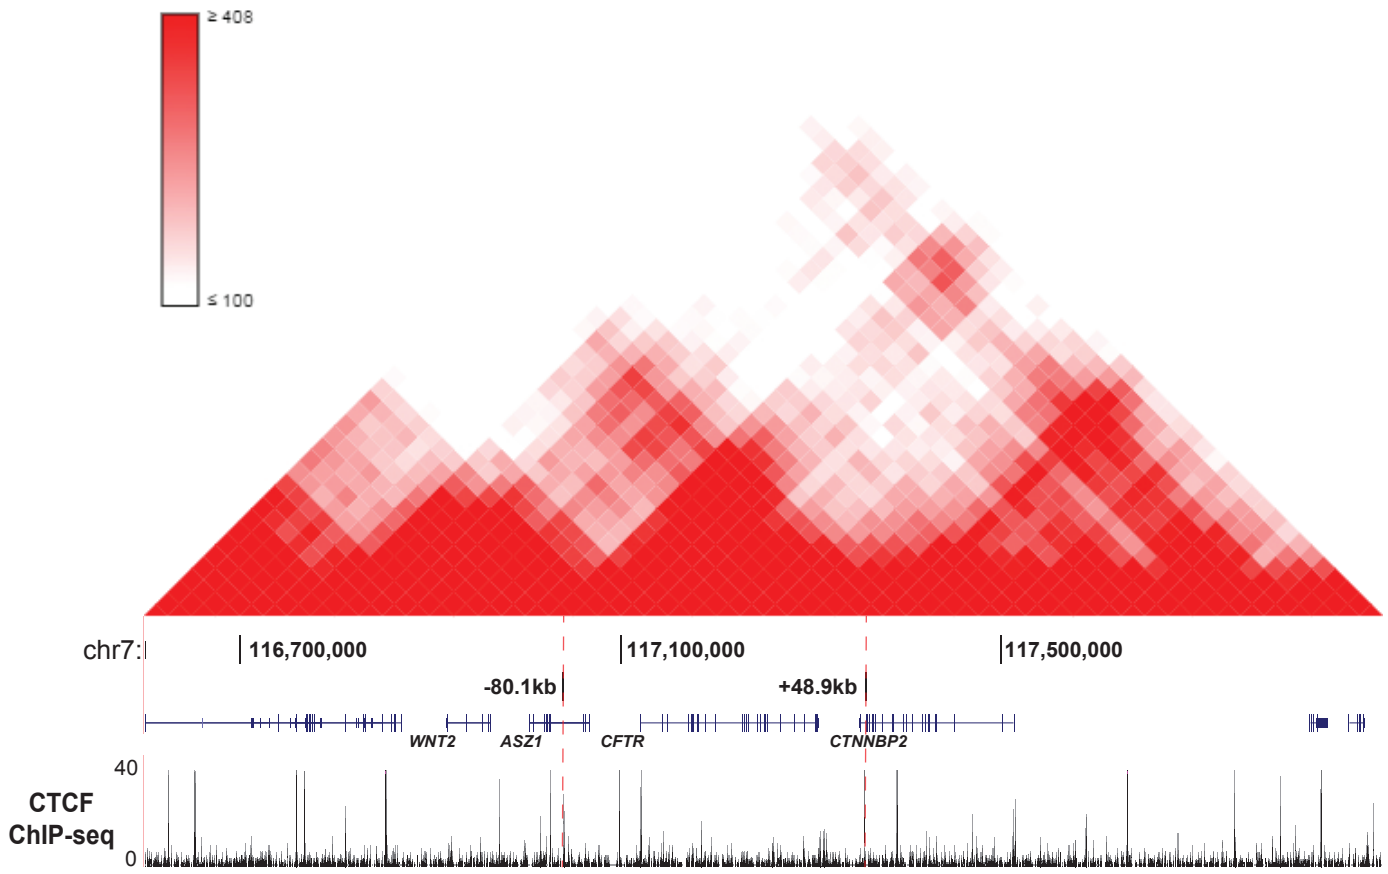

Supplementary Figure 1

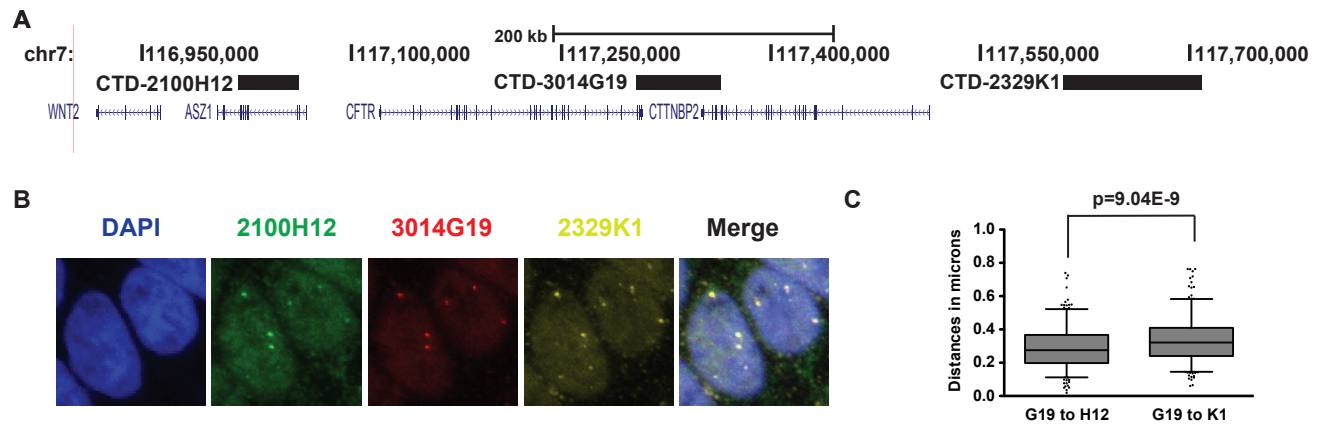

Supplementary Figure 2

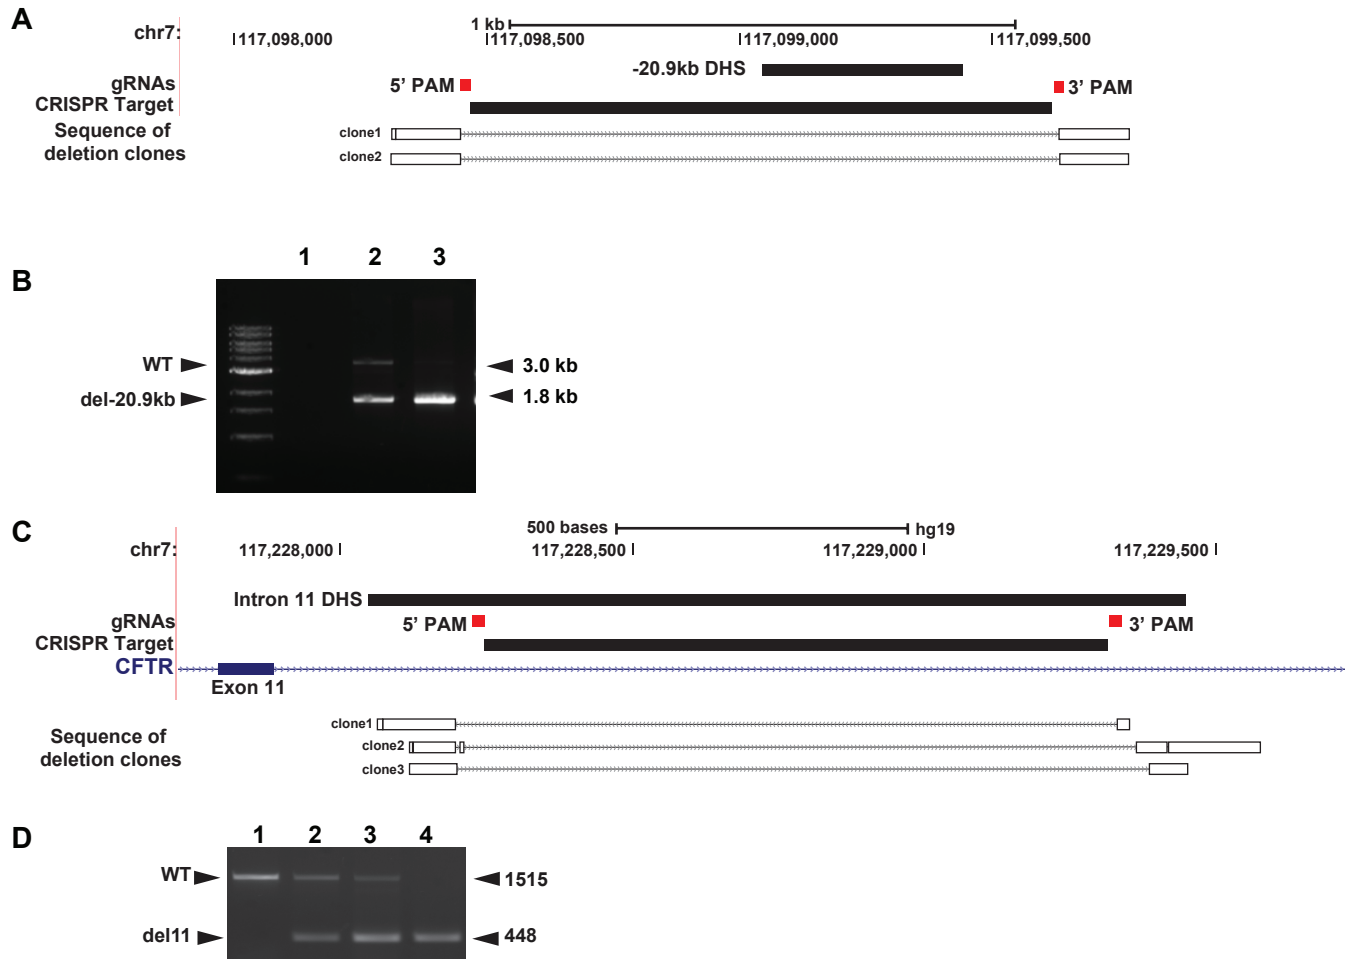

Supplementary Figure 3

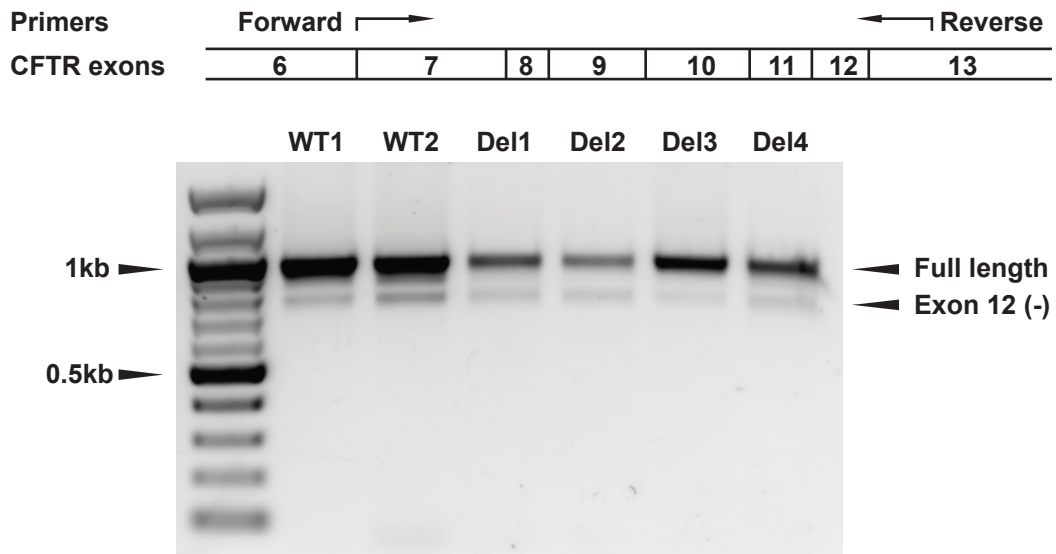

**Supplementary Figure 4**

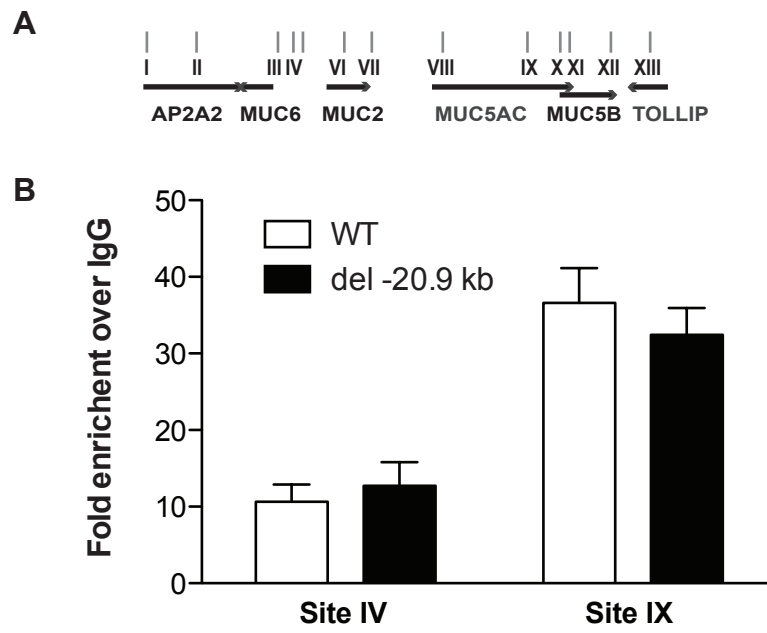

Supplementary Figure 5

Supplementary Table 1. Primer sequences for ChIP-qPCR and RT-PCR

| ChIP-qPCR Primer Sets          | Sequences                       |
|--------------------------------|---------------------------------|
| -80.1kb F                      | GGGCATTCAAAGAAAAGCAGAAAGC       |
| -80.1kb R                      | ACCCAGTACAGAGACGTGACA           |
| Promoter F                     | GTTCTCCCGCCGGTGG                |
| Promoter R                     | CAGTCGCGGCCTCTCTTTAG            |
| Intron 1 CTCF F (185+1kb)      | GCAGTTAATCCTGGAACCTCCGGTGC      |
| Intron 1 CTCF R (185+1kb)      | AAGTCCTTCTCTCATCCACAGGG         |
| Intron 1 enhancer F (185+10kb) | TCATTGTCAACTGTCAGGTAGCAA        |
| Intron 1 enhancer R (185+10kb) | CAGAGTTAGGATTCCAGCCAGG          |
| Intron 10 F                    | TGCTTTATTGAATGGCATTACCTCTA      |
| Intron 10 R                    | AGATGCTTGTGGTAAGGGAGGAG         |
| Intron 11 F                    | TCCAAAAGCTGAGACAGGAAACT         |
| Intron 11 R                    | ATTACATACACACAAAAGTACACACATGACT |
| +48.9kb F                      | GGCATCAGCCAGTCAAGGTT            |
| +48.9kb R                      | AGCAGAGGGCAAAGTGGTACTT          |
| +83.7kb F                      | CCGGGTCGAACATGCAAAGC            |
| +83.7kb R                      | AGCCCTCTGCTGGAAGCGTG            |

| RT-PCR Primer Sets | Sequences            |
|--------------------|----------------------|
| B1R                | GACAAACAGAAGTGAAGCTG |
| B1L                | CAGCTTTCTTTAAATGTTCC |



Supplementary Table 2. Restriction enzyme pairs and primer sequences used for 4C library generation.

| Viewpoint      | Primary enzyme | Secondary enzyme | Reading primer                                                                               | Non-reading primer                                        |
|----------------|----------------|------------------|----------------------------------------------------------------------------------------------|-----------------------------------------------------------|
| Promoter       | NlaIII         | Csp6I            | AATGATACGGCGACCACCGAA<br>CACTCTTCCCTACACGACGCT<br>CTTCCGATCTGCACTTACTAT<br>ATGCAGGCATG       | CAAGCAGAAGACGG<br>CATACGATGAAGTG<br>TTCTTTGGATATTG<br>C   |
| Promoter<br>CG | NlaIII         | Csp6I            | AATGATACGGCGACCACCGAA<br>CACTCTTCCCTACACGACGCT<br>CTTCCGATCTCGGCACTTACT<br>ATATGCAGGCATG     | CAAGCAGAAGACGG<br>CATACGATGAAGTG<br>TTCTTTGGATATTG<br>C   |
| Promoter<br>AT | NlaIII         | Csp6I            | AATGATACGGCGACCACCGAA<br>CACTCTTCCCTACACGACGCT<br>CTTCCGATCTATGCACTTACT<br>ATATGCAGGCATG     | CAAGCAGAAGACGG<br>CATACGATGAAGTG<br>TTCTTTGGATATTG<br>C   |
| Promoter<br>GA | NlaIII         | Csp6I            | AATGATACGGCGACCACCGAA<br>CACTCTTCCCTACACGACGCT<br>CTTCCGATCTGAGCACTTACT<br>ATATGCAGGCATG     | CAAGCAGAAGACGG<br>CATACGATGAAGTG<br>TTCTTTGGATATTG<br>C   |
| Promoter<br>TA | NlaIII         | Csp6I            | AATGATACGGCGACCACCGAA<br>CACTCTTCCCTACACGACGCT<br>CTTCCGATCTTAGCACTTACT<br>ATATGCAGGCATG     | CAAGCAGAAGACGG<br>CATACGATGAAGTG<br>TTCTTTGGATATTG<br>C   |
| Promoter<br>AG | NlaIII         | Csp6I            | AATGATACGGCGACCACCGAA<br>CACTCTTCCCTACACGACGCT<br>CTTCCGATCTAGGCACTTACT<br>ATATGCAGGCATG     | CAAGCAGAAGACGG<br>CATACGATGAAGTG<br>TTCTTTGGATATTG<br>C   |
| Promoter<br>GC | NlaIII         | Csp6I            | AATGATACGGCGACCACCGAA<br>CACTCTTCCCTACACGACGCT<br>CTTCCGATCTGCGCACTTACT<br>ATATGCAGGCATG     | CAAGCAGAAGACGG<br>CATACGATGAAGTG<br>TTCTTTGGATATTG<br>C   |
| -20.9kb        | NlaIII         | DpnII            | AATGATACGGCGACCACCGAA<br>CACTCTTCCCTACACGACGCT<br>CTTCCGATCTTTAACAAAGTT<br>TAGGTAAATGACCA    | CAAGCAGAAGACGG<br>CATACGACAAAGTG<br>AGCTATTTTGTTTT<br>CTC |
| -20.9kb<br>CG  | NlaIII         | DpnII            | AATGATACGGCGACCACCGAA<br>CACTCTTCCCTACACGACGCT<br>CTTCCGATCTCGTTAACAAAG<br>TTTAGGTAAATGACCA  | CAAGCAGAAGACGG<br>CATACGACAAAGTG<br>AGCTATTTTGTTTT<br>CTC |
| -20.9kb<br>AT  | NlaIII         | DpnII            | AATGATACGGCGACCACCGAA<br>CACTCTTCCCTACACGACGCT<br>CTTCCGATCTATTTAACAAAG<br>TTTAGGTAAATGACCA  | CAAGCAGAAGACGG<br>CATACGACAAAGTG<br>AGCTATTTTGTTTT<br>CTC |
| -20.9kb<br>GA  | NlaIII         | DpnII            | AATGATACGGCGACCACCGAA<br>CACTCTTCCCTACACGACGCT<br>CTTCCGATCTGATTTAACAAAG<br>TTTAGGTAAATGACCA | CAAGCAGAAGACGG<br>CATACGACAAAGTG<br>AGCTATTTTGTTTT<br>CTC |

|               |        |       |                                                                                          |                                                    |
|---------------|--------|-------|------------------------------------------------------------------------------------------|----------------------------------------------------|
| +48.9kb       | NlaIII | DpnII | AATGATACGGCGACCACCGAA<br>CACTCTTCCCTACACGACGCT<br>CTTCCGATCTGAGTGAGCTTG<br>AAAGCCATG     | CAAGCAGAAGACGG<br>CATACGATGGAACA<br>TCGTCAGTGGAAG  |
| +48.9kb<br>AT | NlaIII | DpnII | AATGATACGGCGACCACCGAA<br>CACTCTTCCCTACACGACGCT<br>CTTCCGATCTATGAGTGAGCT<br>TGAAAGCCATG   | CAAGCAGAAGACGG<br>CATACGATGGAACA<br>TCGTCAGTGGAAG  |
| +48.9kb<br>CG | NlaIII | DpnII | AATGATACGGCGACCACCGAA<br>CACTCTTCCCTACACGACGCT<br>CTTCCGATCTCGGAGTGAGCT<br>TGAAAGCCATG   | CAAGCAGAAGACGG<br>CATACGATGGAACA<br>TCGTCAGTGGAAG  |
| +48.9kb<br>GA | NlaIII | DpnII | AATGATACGGCGACCACCGAA<br>CACTCTTCCCTACACGACGCT<br>CTTCCGATCTGAGAGTGAGCT<br>TGAAAGCCATG   | CAAGCAGAAGACGG<br>CATACGATGGAACA<br>TCGTCAGTGGAAG  |
| -80.1kb       | NlaIII | Csp6I | AATGATACGGCGACCACCGAA<br>CACTCTTCCCTACACGACGCT<br>CTTCCGATCTACTGAGAACTT<br>ACAGGGCAGTC   | CAAGCAGAAGACGG<br>CATACGACTGGTAG<br>CTTTTGGTTGAATG |
| -80.1kb<br>AT | NlaIII | Csp6I | AATGATACGGCGACCACCGAA<br>CACTCTTCCCTACACGACGCT<br>CTTCCGATCTATACTGAGAAC<br>TTACAGGGCAGTC | CAAGCAGAAGACGG<br>CATACGACTGGTAG<br>CTTTTGGTTGAATG |
| -80.1kb<br>CG | NlaIII | Csp6I | AATGATACGGCGACCACCGAA<br>CACTCTTCCCTACACGACGCT<br>CTTCCGATCTCGACTGAGAAC<br>TTACAGGGCAGTC | CAAGCAGAAGACGG<br>CATACGACTGGTAG<br>CTTTTGGTTGAATG |
| -80.1kb<br>GA | NlaIII | Csp6I | AATGATACGGCGACCACCGAA<br>CACTCTTCCCTACACGACGCT<br>CTTCCGATCTGAACTGAGAAC<br>TTACAGGGCAGTC | CAAGCAGAAGACGG<br>CATACGACTGGTAG<br>CTTTTGGTTGAATG |
| +15.6kb       | NlaIII | Csp6I | AATGATACGGCGACCACCGAA<br>CACTCTTCCCTACACGACGCT<br>CTTCCGATCTTGAAACCCTAT<br>TTGAATAGCATG  | CAAGCAGAAGACGG<br>CATACGAATTTGTG<br>TGTTTGGCTTTGG  |

Supplementary Table 3. List of gRNA sequences and PCR primers used for generation and validation of -20.9kb and intron 11 CRISPR/Cas9 clones.

| Name                       | Sequences               |
|----------------------------|-------------------------|
| -20.9kb 5' gRNA            | CTGTAGACCATCCTTATTA ACT |
| -20.9kb 3' gRNA            | ACATCTTAATATAGCCATT     |
| Intron 11 5' gRNA          | CTGCCACTCCAATGTACACACC  |
| Intron 11 3' gRNA          | CATTATGTAGCTCTTGCATACT  |
| -20.9kb validation PCR F   | AACCTCATGCTTGTGCAAAT    |
| -20.9kb validation PCR R   | TCCATCACATCCCATTTGAG    |
| Intron 11 validation PCR F | GCCCGTATCTTGGTGTCAGT    |
| Intron 11 validation PCR R | AAGATGAAGACACAGTTCC     |
